## **COVID-19-related burnout reduces COVID-19 vaccination intention in cardiac patients: a cross-sectional study in Greece**

**Petros Galanis**, Assistant Professor, Clinical Epidemiology Laboratory, Faculty of Nursing, National and Kapodistrian University of Athens, Greece

**Aglaia Katsiroumpa**, RN, MSc, PhD (c), Clinical Epidemiology Laboratory, Faculty of Nursing, National and Kapodistrian University of Athens, Greece

**Irene Vraka**, MD, PhD, Department of Radiology, P & A Kyriakou Children's Hospital, Athens, Greece

**Olga Siskou**, Assistant Professor, University of Piraeus, Greece

**Olympia Konstantakopoulou**, Economist, MSc, PhD, Center for Health Services Management and Evaluation, Faculty of Nursing, National and Kapodistrian University of Athens, Greece

**Daphne Kaitelidou**, Professor, Center for Health Services Management and Evaluation, Faculty of Nursing, National and Kapodistrian University of Athens, Greece

**Corresponding author:** Petros Galanis, Assistant Professor, Clinical Epidemiology Laboratory, Faculty of Nursing, National and Kapodistrian University of Athens, 123 Papadiamantopoulou street, GR-11527, Athens, Greece, e-mail: [pegalan@nurs.uoa.gr](mailto:pegalan@nurs.uoa.gr), <https://orcid.org/0000-0002-1308-5782>

## **Abstract**

**Background:** New SARS-CoV-2 variants have emerged and COVID-19 is still a public health issue, especially for vulnerable groups such as people with chronic medical conditions.

**Objective:** To investigate the impact of COVID-19-related burnout on COVID-19 vaccination intention in cardiac patients. Moreover, we investigated other possible demographic and psychological predictors of vaccination intention in cardiac patients.

**Methods:** We conducted a cross-sectional study in Greece using a convenience sample. Data collection was performed from 20 November 2022 to 10 January 2023. We measured demographic data, COVID-19-related burnout, anxiety, depression, social support, and resilience. We used the following valid tools: COVID-19 burnout scale, Patient Health Questionnaire-4, Multidimensional Scale of Perceived Social Support, and Brief Resilience Scale.

**Results:** Among patients, 45.8% were willing to accept a COVID-19 booster dose, 25.3% were hesitant, and 28.9% were unwilling. Patients experienced moderate levels of COVID-19-related burnout. After multivariable linear regression analysis, we found that increased age and decreased emotional exhaustion due to COVID-19 were associated with increased vaccination intention. Moreover, patients who have already received a booster dose had also a greater willingness to accept a new booster dose.

**Conclusions:** Identification of factors that influence patients' decision to accept a COVID-19 booster dose is crucial to maintain a high vaccination coverage rate among them in order to avoid COVID-19-related outcomes. Since a COVID-19 booster dose on an annual basis seems to be necessary policy makers should develop and implement vaccination programmes tailored for patients.

**Keywords:** COVID-19, vaccination, intention, patients, burnout, COVID-19 burnout scale

## Introduction

COVID-19 pandemic continuous to threat public health, healthcare systems and economies causing more than 6.7 million deaths until 25 January 2023.<sup>1</sup> COVID-19 patients with a known chronic medical condition have more poor outcomes (i.e., disease severity, admission to intensive care unit, invasive ventilation, and death) than COVID-19 patients without comorbidity.<sup>2-4</sup> Thus, several underlying disorders, such as cardiovascular diseases, cerebrovascular disease, diabetes, hypertension, and chronic kidney disease are considered as important risk factors for COVID-19 patients.<sup>2-4</sup>

Several systematic reviews including a great number of studies have already shown that COVID-19 vaccines are effective and safe in patients with chronic diseases, such as malignancies, immune-mediated inflammatory disease, and immunocompromised patients.<sup>5-9</sup> Moreover, evidence from studies including individuals with cardiovascular disease supports the safety and effectiveness of COVID-19 vaccines in this population group.<sup>10,11</sup> That is, the Heart Failure Association of the European Society of Cardiology and the American Heart Association suggest COVID-19 vaccination as soon as possible to individuals with heart failure, heart disease, heart attack, and cardiovascular risk factors since they are high risk groups to develop COVID-19 outcomes.<sup>12</sup>

Although vaccination promotes public health and it is a cost-effectiveness intervention even in case of COVID-19,<sup>13-15</sup> vaccine hesitancy is still one of the biggest threats to global health<sup>16</sup>. Socio-demographic variables, psychological factors, vaccine hesitancy, COVID-19 related variables, personal beliefs, knowledge, fear, conspiracy theories, fake news, and trust are the most important factors that influence individuals' decision to accept the COVID-19 vaccines.<sup>17-22</sup>

New SARS-CoV-2 variants are emerged and COVID-19 is still a public health issue especially for vulnerable groups such as people with chronic medical conditions. Thus, vaccination uptake against COVID-19 among high-risk groups should be maintained in high levels in order to avoid the negative consequences of the disease. Therefore, the aim of our study was to investigate the impact of COVID-19-related burnout on COVID-19 vaccination intention in cardiac patients. Moreover, we investigated other possible demographic and psychological predictors of vaccination intention in cardiac patients.

## **Methods**

### ***Study design***

We performed a cross-sectional study in Greece using a convenience sample of cardiac patients. Data collection was performed from 20 November 2022 to 10 January 2023. Our inclusion criteria were the following: (a) cardiac patients with a confirmed diagnosis, (b) adults over 18 years old, (c) people who can understand the Greek language, and (d) individuals that had been fully vaccinated against COVID-19 with the primary doses.

Our study was anonymous and voluntary and participants gave their informed consent. Moreover, we conducted our study according to the guidelines of the Declaration of Helsinki. Additionally, our study protocol was approved by the Ethics Committee of Faculty of Nursing, National and Kapodistrian University of Athens (reference number; 421, 10 November 2022).

### ***Measurements***

Study questionnaire included demographic data, COVID-19-related burnout, anxiety, depression, social support and resilience. We measured the following demographic

data: gender, age, educational level, self-perceived health status, SARS-CoV-2 infection, COVID-19 booster doses, and adverse effects because of COVID-19 vaccination.

We used the COVID-19 burnout scale (COVID-19-BS) to measure COVID-19-related burnout among cardiac patients.<sup>23</sup> The COVID-19-BS includes 13 items and three factors (i.e., emotional exhaustion, physical exhaustion, and exhaustion due to measures against the COVID-19). Each factor takes values from 1 to 5 with higher values being indicative of higher level of COVID-19-related burnout. A previous study in a Greek sample showed that the COVID-19-BS is a reliable and valid tool.<sup>24</sup> In our study, Cronbach's alpha coefficient for the factor "emotional exhaustion" was 0.923, for the factor "physical exhaustion" was 0.856, and for the factor "exhaustion due to measures against the COVID-19" was 0.904. Thus, the reliability of the COVID-19-BS was excellent.

We measured anxiety and depression among cardiac patients with the Patient Health Questionnaire-4 (PHQ-4).<sup>25</sup> In particular, we used the reliable and valid Greek version of the PHQ-4.<sup>26</sup> Anxiety and depression scores range from 0 (normal levels) to 6 (severe symptomatology). In our study, Cronbach's alpha coefficient for the anxiety was 0.871, and for the depression was 0.820 indicating very good reliability.

Social support was measured with the Greek version of the Multidimensional Scale of Perceived Social Support (MSPSS).<sup>27,28</sup> Total support score ranges from 1 (low levels of support) to 7 (high levels of support). In our study, Cronbach's alpha coefficient for the MSPSS was excellent with a value of 0.942.

Resilience was measured with the Greek version of the Brief Resilience Scale (BRS).<sup>29,30</sup> Resilience score takes values from 1 (low resilience) to 5 (high resilience). In our study, reliability of the BRS was very good, i.e., Cronbach's alpha coefficient was equal to 0.818.

We used one single item to measure patients' intention to accept a COVID-19 vaccine. In particular, we asked patients "How likely do you think you are to get a booster COVID-19 booster dose?" and their answers were on a scale from 0 (very unlikely) to 10 (very likely). In order to categorize patients, we considered answers (a) from 0 to 2 as unwilling patients to accept a booster dose, (b) answers from 3 to 7 as hesitant patients, and (c) answers from 8 to 10 as willing patients.

### *Statistical analysis*

We use descriptive statistics to present categorical and continuous variables. In particular, we use numbers and percentages for the categorical variables. Also, we use mean, standard deviation, median, minimum value, and maximum value for the continuous variables. We considered demographic data, COVID-19-related burnout, anxiety, depression, social support and resilience as possible predictors of patients' vaccination intention to accept a COVID-19 vaccine. Vaccination intention score followed normal distribution. Thus, we used univariate and multivariable linear regression analysis to assess the impact of independent variables on vaccination intention. In that case, we presented unadjusted and adjusted coefficients beta, 95% confidence intervals (CI) and p-values. Independent variables with a p-value < 0.05 in the multivariable model were considered as statistically significant. We used the IBM SPSS 21.0 (IBM Corp. Released 2012. IBM SPSS Statistics for Windows, Version 21.0. Armonk, NY: IBM Corp.) for the analysis.

### **Results**

Study sample included 166 cardiac patients. Mean age of the participants was 52.4 years. Most of the participants were females (77.1%), possessed a university degree (77.1%), and self-estimated their health status as very poor/poor/moderate (79.5%). Also, 61.4% of patients had been infected with SARS-CoV-2 during the pandemic.

The majority of patients have received a booster dose (91.6%). Detailed demographic data of patients are shown in Table 1.

**Table 1.** Demographic data of patients (N=166).

| Variables                                                    | N    | %    |
|--------------------------------------------------------------|------|------|
| Gender                                                       |      |      |
| Males                                                        | 38   | 22.9 |
| Females                                                      | 128  | 77.1 |
| Age (years) <sup>a</sup>                                     | 52.4 | 9.9  |
| Educational level                                            |      |      |
| High school                                                  | 38   | 22.9 |
| University degree                                            | 128  | 77.1 |
| Self-perceived health status                                 |      |      |
| Very poor/poor/moderate                                      | 132  | 79.5 |
| Good/very good                                               | 34   | 20.5 |
| SARS-CoV-2 infection                                         |      |      |
| No                                                           | 64   | 38.6 |
| Yes                                                          | 102  | 61.4 |
| COVID-19 booster doses                                       |      |      |
| No                                                           | 14   | 8.4  |
| Yes                                                          | 152  | 91.6 |
| Adverse effects because of COVID-19 vaccination <sup>a</sup> | 2.7  | 2.7  |

<sup>a</sup> mean, standard deviation

Descriptive statistics for the scales in our study are shown in Table 2. Patients' vaccination intention to accept a COVID-19 booster dose was moderate. In particular,

45.8% (n=76) of patients were willing to accept a booster dose, 25.3% (n=42) were hesitant, and 28.9% (n=48) were unwilling. Patients experienced moderate levels of COVID-19-related burnout. Also, levels of emotional exhaustion due to COVID-19 (mean score=3.29) and exhaustion due to measures against the COVID-19 (mean score=3.14) were higher than levels of physical exhaustion due to COVID-19 (mean score=2.46). Anxiety and depression symptoms were low to moderate among patients. Moreover, patients were received high levels of social support, while their resilience was moderate.

**Table 2.** Descriptive statistics for the scales in our study.

| <b>Score</b>                                    | <b>Mean</b> | <b>Standard deviation</b> | <b>Median</b> | <b>Minimum value</b> | <b>Maximum value</b> |
|-------------------------------------------------|-------------|---------------------------|---------------|----------------------|----------------------|
| Emotional exhaustion due to COVID-19            | 3.29        | 1.27                      | 3.6           | 1                    | 5                    |
| Physical exhaustion due to COVID-19             | 2.46        | 1.12                      | 2.3           | 1                    | 5                    |
| Exhaustion due to measures against the COVID-19 | 3.14        | 1.34                      | 3.3           | 1                    | 5                    |
| Anxiety                                         | 2.07        | 1.75                      | 2.0           | 0                    | 6                    |
| Depression                                      | 2.00        | 1.73                      | 2.0           | 0                    | 6                    |
| Social support                                  | 5.67        | 1.31                      | 6.0           | 1.2                  | 7                    |
| Resilience                                      | 3.51        | 0.78                      | 3.7           | 1.8                  | 5                    |
| Vaccination intention                           | 5.64        | 3.84                      | 6.0           | 0                    | 10                   |

Linear regression models with patients' intention to accept a COVID-19 booster dose as the dependent variable are shown in Table 3. Univariate linear regression found that ten variables were associated with patients' decision to accept a COVID-19 booster dose, i.e. gender, age, educational level, previous COVID-19 booster doses, adverse effects because of COVID-19 vaccination, emotional exhaustion due to COVID-19, physical exhaustion due to COVID-19, exhaustion due to measures against the COVID-19, anxiety, and depression. After multivariable linear regression



analysis, we found that increased age and decreased emotional exhaustion due to COVID-19 were associated with increased vaccination intention. Moreover, patients who have already received a booster dose had also a greater willingness to accept a new booster dose.

**Table 3.** Univariate and multivariable linear regression analysis with patients' intention to accept a COVID-19 booster dose as the dependent variable.

| Independent variables                                                     | Univariate model                        |         | Multivariable model                                |         |
|---------------------------------------------------------------------------|-----------------------------------------|---------|----------------------------------------------------|---------|
|                                                                           | Unadjusted coefficient<br>beta (95% CI) | P-value | Adjusted coefficient<br>beta (95% CI) <sup>a</sup> | P-value |
| Gender (females vs. males)                                                | -2.79 (-4.13 to -1.45)                  | <0.001  | -1.17 (-2.46 to 0.12)                              | 0.07    |
| Age (years)                                                               | 0.18 (0.13 to 0.23)                     | <0.001  | 0.11 (0.04 to 0.17)                                | 0.001   |
| Educational level (university degree vs. high school)                     | -1.42 (-2.81 to -0.04)                  | 0.04    | -1.29 (-2.64 to 0.07)                              | 0.06    |
| Self-perceived health status (good/very good vs. very poor/poor/moderate) | 0.46 (-1.01 to 1.92)                    | 0.54    | 0.06 (-1.25 to 1.36)                               | 0.93    |
| SARS-CoV-2 infection (yes vs. no)                                         | -0.54 (-1.75 to 0.67)                   | 0.38    | -0.03 (-1.04 to 0.98)                              | 0.96    |
| COVID-19 booster doses (yes vs. no)                                       | 5.38 (3.42 to 7.33)                     | <0.001  | 4.00 (2.17 to 5.83)                                | <0.001  |
| Adverse effects because of COVID-19 vaccination                           | -0.46 (-0.67 to -0.25)                  | <0.001  | -0.12 (-0.35 to 0.12)                              | 0.32    |
| Emotional exhaustion due to COVID-19                                      | -0.89 (-1.34 to -0.45)                  | <0.001  | -0.64 (-1.24 to -0.04)                             | 0.04    |
| Physical exhaustion due to COVID-19                                       | -0.63 (-1.15 to -0.11)                  | 0.02    | 0.26 (-0.49 to 1.02)                               | 0.49    |
| Exhaustion due to measures against the COVID-19                           | -0.73 (-1.16 to -0.31)                  | 0.001   | -0.39 (-0.86 to 0.07)                              | 0.10    |
| Anxiety                                                                   | -0.49 (-0.82 to -0.16)                  | 0.004   | 0.01 (-0.51 to 0.54)                               | 0.96    |
| Depression                                                                | -0.42 (-0.76 to -0.09)                  | 0.01    | 0.002 (-0.50 to 0.51)                              | 0.99    |
| Social support                                                            | 0.08 (-0.37 to 0.53)                    | 0.73    | 0.01 (-0.45 to 0.48)                               | 0.96    |
| Resilience                                                                | 0.16 (-0.61 to 0.92)                    | 0.69    | -0.56 (-1.36 to 0.24)                              | 0.17    |

CI: confidence interval

<sup>a</sup> p-value for ANOVA<0.001; R<sup>2</sup> for the final multivariable model was 35.4%

## Discussion

We conducted a study in Greece in order to assess the intention of cardiac patients to accept a COVID-19 booster dose. Moreover, we investigated possible predictors of such intention including demographic variables, COVID-19-related burnout, anxiety, depression, social support, and resilience.

Among cardiac patients, 45.8% were willing to accept a booster dose, 25.3% were hesitant, and 28.9% were unwilling. These results are worrying since acceptance level was low considering the fact that a meta-analysis found that 79% of the general population was willing to accept a first COVID-19 booster dose.<sup>18</sup> Additionally, several studies including patients with chronic medical conditions found higher acceptance rates than our study population ranging from 54.2% to 70.4%.<sup>31–33</sup> However, it is probable that these differences could be attributed to the different time that studies were conducted. Moreover, 62% of participants in a study in Greece that was conducted in May 2022 were willing to receive a second booster dose.<sup>34</sup> However, later studies in Greece that were conducted during September-October 2022 found significant lower vaccination acceptance even among nurses. In particular, in a sample from the general population 34.1% reported being very likely to be vaccinated with a booster dose,<sup>24</sup> while among nurses the respective percentage was slightly higher (37.1%)<sup>35</sup>. Moreover, low levels of seasonal influenza vaccine intention among nurses in Greece for the 2022/2023 season (57.3%) are an alarmed sign of vaccine hesitancy in the country.<sup>36</sup>

We found that COVID-19-related burnout affect negatively the intention of cardiac patients to accept a booster dose. Earlier studies in Greece confirm this finding including samples from the general population and nurses.<sup>24,35</sup> No other studies has investigated until now this relationship throughout the world. Although we cannot make direct comparisons with other studies, we should notice that three years after the

onset of the COVID-19 pandemic it is quite probable that people experience burnout. Additionally, it is well known that consequences for COVID-19 patients with comorbidity, such as disease severity, admission to intensive care unit, invasive ventilation, and death are worse than COVID-19 patients without comorbidity.<sup>2-4</sup> Thus, people with a chronic disease may experience higher levels of burnout during the pandemic, as they may need to adhere to measures against the COVID-19 more than healthy people in order to avoid COVID-19-related outcomes. Moreover, emotional exhaustion due to COVID-19 may be higher among patients since they experience higher levels of fear. Literature suggests a positive relationship between fear and social and mental health outcomes during the pandemic, e.g. depression, anxiety, stress, and insomnia.<sup>37-42</sup> There is a need for greater focus on patients' mental health issues, such as COVID-19-related burnout, fear, depression, anxiety, etc.

Also, our results showed that age was associated with COVID-19 vaccination intention in cardiac patients as we expected. Literature supports this finding since several systematic reviews found that older age is a strong predictor of COVID-19 vaccination intention and uptake.<sup>19,43,44</sup> Similar studies earlier in Greece suggest that increased age is associated with an increased probability of vaccine uptake.<sup>45,46</sup> Several meta-analyses have shown that older age is associated with an increased risk of hospitalization, admission to intensive care unit, and death.<sup>47-49</sup> Thus, older patients may feel more vulnerable against COVID-19. In addition, self-perceived risk of infection could be higher among patients. It makes sense that older patients are more afraid of the negative effects of COVID-19 and that result on a higher vaccination intention.

According to our study, patients who have received a booster dose were also more intended to accept further vaccination. A previous COVID-19 booster dose indicates the positive attitude of individuals towards vaccination. Previous studies in Greece found that seasonal influenza vaccination was related with COVID-19 vaccines

intention and uptake.<sup>34,46</sup> Moreover, trust in COVID-19 vaccination is a strong predictor COVID-19 vaccine uptake.<sup>45,50</sup> COVID-19 vaccine hesitancy is one of the biggest threats to fighting the disease through vaccination. Several factors are the major predictors of vaccine hesitancy: socio-demographic factors, psychological factors, occupational factors, knowledge, and conspiracy beliefs.<sup>51</sup> Vaccine hesitancy threatens public health for the last two decades. Concerns on safety and efficacy of vaccines, poor knowledge and information, and mistrust of public health authorities, healthcare workers, and new vaccines are significant barriers.<sup>52-54</sup>

Our study has several limitations. First, we used a convenience sample that cannot be representative of the cardiac patients. Second, the number of our participants was limited. Thus, further studies with bigger and random samples would add significant information. Third, we investigated several possible predictors of vaccination intention but there is still room to search for others. Fourth, we used a self-reported questionnaire and information bias could exist. Fifth, as a cross-sectional study design was used causal relationships cannot be established. Thus, there is a need for prospective studies with less bias. Finally, we measured vaccination intention that is a proxy for vaccination uptake. Therefore, future studies should measure vaccination uptake among patients in order to get more valid results.

In conclusion, we found that the percentage of cardiac patients who were willing to accept a COVID-19 booster dose was low. Moreover, we found that increased age and decreased emotional exhaustion due to COVID-19 were associated with increased vaccination intention. Identification of factors that influence patients' decision to accept a COVID-19 booster dose is crucial to maintain a high vaccination coverage rate among them in order to avoid COVID-19-related outcomes. Since a COVID-19 booster dose on an annual basis seems to be necessary policy makers should develop and implement vaccination programmes tailored for patients. Positive attitudes

towards vaccination, trust on public health authorities and elimination of conspiracy beliefs are essential to improve COVID-19 vaccination uptake.

## References

1. Worldometer. COVID-19 pandemic. [Internet]. 2022 [cited 2023 Jan 23]. Available from: [https://www.worldometers.info/coronavirus/?fbclid=IwAR3T5FX-sv\\_X1GABioSDrcHEHSxg694\\_LZmDFQ3lFJjsBQQmiTemxcAow5k#countries](https://www.worldometers.info/coronavirus/?fbclid=IwAR3T5FX-sv_X1GABioSDrcHEHSxg694_LZmDFQ3lFJjsBQQmiTemxcAow5k#countries)
2. Fang X, Li S, Yu H, Wang P, Zhang Y, Chen Z, et al. Epidemiological, comorbidity factors with severity and prognosis of COVID-19: a systematic review and meta-analysis. *Aging (Albany NY)*. 2020 Jul 13;12(13):12493–503.
3. Fathi M, Vakili K, Sayehmiri F, Mohamadkhani A, Hajiesmaeili M, Rezaei-Tavirani M, et al. The prognostic value of comorbidity for the severity of COVID-19: A systematic review and meta-analysis study. *PLoS One*. 2021;16(2):e0246190.
4. Yin T, Li Y, Ying Y, Luo Z. Prevalence of comorbidity in Chinese patients with COVID-19: systematic review and meta-analysis of risk factors. *BMC Infect Dis*. 2021 Feb 22;21(1):200.
5. Javadinia SA, Alizadeh K, Mojadadi MS, Nikbakht F, Dashti F, Joudi M, et al. COVID-19 Vaccination in Patients With Malignancy; A Systematic Review and Meta-Analysis of the Efficacy and Safety. *Front Endocrinol (Lausanne)*. 2022;13:860238.
6. Lee ARYB, Wong SY, Tay SH. Booster COVID-19 Vaccines for Immune-Mediated Inflammatory Disease Patients: A Systematic Review and Meta-Analysis of Efficacy and Safety. *Vaccines (Basel)*. 2022 Apr 22;10(5):668.
7. Marra AR, Kobayashi T, Suzuki H, Alsuhaibani M, Tofaneto BM, Bariani LM, et al. Short-term effectiveness of COVID-19 vaccines in immunocompromised patients: A systematic literature review and meta-analysis. *J Infect*. 2022 Mar;84(3):297–310.
8. Rinaldi I, Pratama S, Wiyono L, Tandaju JR, Wardhana IL, Winston K. Efficacy and safety profile of COVID-19 mRNA vaccine in patients with hematological malignancies: Systematic review and meta-analysis. *Front Oncol*. 2022;12:951215.
9. Sun H, Bu F, Li L, Zhang X, Yan J, Huang T. COVID-19 vaccine response and safety in patients with cancer: An overview of systematic reviews. *Front Public Health*. 2022;10:1072137.

10. Ye X, Ma T, Blais JE, Yan VKC, Kang W, Chui CSL, et al. Association between BNT162b2 or CoronaVac COVID-19 vaccines and major adverse cardiovascular events among individuals with cardiovascular disease. *Cardiovascular Research*. 2022 Jul 27;118(10):2329–38.
11. Ye X, Huang C, Wei Y, Li STH, Yan VKC, Yiu KH, et al. Safety of BNT162b2 or CoronaVac COVID-19 vaccines in patients with heart failure: A self-controlled case series study. *The Lancet Regional Health - Western Pacific*. 2023 Jan;30:100630.
12. Rosano G, Jankowska EA, Ray R, Metra M, Abdelhamid M, Adamopoulos S, et al. COVID-19 vaccination in patients with heart failure: a position paper of the Heart Failure Association of the European Society of Cardiology. *European J of Heart Fail*. 2021 Nov;23(11):1806–18.
13. Machlaurin A, Pol S van der, Setiawan D, van der Werf TS, Postma MJ. Health economic evaluation of current vaccination strategies and new vaccines against tuberculosis: a systematic review. *Expert Review of Vaccines*. 2019 Sep 2;18(9):897–911.
14. Pawaskar M, Méroc E, Samant S, Flem E, Bencina G, Riera-Montes M, et al. Economic burden of varicella in Europe in the absence of universal varicella vaccination. *BMC Public Health*. 2021 Dec 21;21(1):2312.
15. Utami AM, Rendrayani F, Khoiry QA, Noviyanti D, Suwantika AA, Postma MJ, et al. Economic evaluation of COVID-19 vaccination: A systematic review. *J Glob Health*. 2023 Jan 14;13:06001.
16. World Health Organization. Ten threats to global health in 2019 [Internet]. 2020. Available from: <https://www.who.int/news-room/spotlight/ten-threats-to-global-health-in-2019>
17. Galanis P, Vraika I, Katsiroumpa A, Siskou O, Konstantakopoulou O, Katsoulas T, et al. COVID-19 Vaccine Uptake among Healthcare Workers: A Systematic Review and Meta-Analysis. *Vaccines*. 2022 Sep 29;10(10):1637.
18. Galanis P, Vraika I, Katsiroumpa A, Siskou O, Konstantakopoulou O, Katsoulas T, et al. First COVID-19 Booster Dose in the General Population: A Systematic Review and Meta-Analysis of Willingness and Its Predictors. *Vaccines*. 2022 Jul 8;10(7):1097.
19. Galanis P, Vraika I, Siskou O, Konstantakopoulou O, Katsiroumpa A, Kaitelidou D. Uptake of COVID-19 Vaccines among Pregnant Women: A Systematic Review and Meta-Analysis. *Vaccines*. 2022 May 12;10(5):766.

20. Limbu YB, Gautam RK, Zhou W. Predicting Vaccination Intention against COVID-19 Using Theory of Planned Behavior: A Systematic Review and Meta-Analysis. *Vaccines (Basel)*. 2022 Nov 26;10(12):2026.
21. Robinson E, Jones A, Lesser I, Daly M. International estimates of intended uptake and refusal of COVID-19 vaccines: A rapid systematic review and meta-analysis of large nationally representative samples. *Vaccine*. 2021 Apr 8;39(15):2024–34.
22. Terry E, Cartledge S, Damery S, Greenfield S. Factors associated with COVID-19 vaccine intentions during the COVID-19 pandemic; a systematic review and meta-analysis of cross-sectional studies. *BMC Public Health*. 2022 Sep 2;22(1):1667.
23. Galanis P, Katsiroumpa A, Sourtzi P, Siskou O, Konstantakopoulou O, Kaitelidou D. The COVID-19 burnout scale: Development and initial validation [Internet]. 2022 [cited 2022 Nov 19]. Available from: <http://medrxiv.org/lookup/doi/10.1101/2022.10.20.22281317>
24. Galanis P, Katsiroumpa A, Sourtzi P, Siskou O, Konstantakopoulou O, Katsoulas T, et al. COVID-19-Related Burnout and Intention of Fully Vaccinated Individuals to Get a Booster Dose: The Mediating Role of Resilience. *Vaccines*. 2022 Dec 27;11(1):62.
25. Kroenke K, Spitzer RL, Williams JBW, Löwe B. An ultra-brief screening scale for anxiety and depression: the PHQ-4. *Psychosomatics*. 2009 Dec;50(6):613–21.
26. Karekla M, Pilipenko N, Feldman J. Patient Health Questionnaire: Greek language validation and subscale factor structure. *Comprehensive Psychiatry*. 2012 Nov;53(8):1217–26.
27. Theofilou P. Translation and cultural adaptation of the Multidimensional Scale of Perceived Social Support for Greece. *Health Psych Res*. 2015 Apr 13;3(1).
28. Zimet GD, Dahlem NW, Zimet SG, Farley GK. The Multidimensional Scale of Perceived Social Support. *Journal of Personality Assessment*. 1988 Mar;52(1):30–41.
29. Kyriazos TA, Stalikas A, Prassa K, Galanakis M, Yotsidi V, Lakioti A. Psychometric Evidence of the Brief Resilience Scale (BRS) and Modeling Distinctiveness of Resilience from Depression and Stress. *PSYCH*. 2018;09(07):1828–57.



30. Smith BW, Dalen J, Wiggins K, Tooley E, Christopher P, Bernard J. The brief resilience scale: Assessing the ability to bounce back. *Int J Behav Med*. 2008 Sep;15(3):194–200.
31. Felten R, Dubois M, Ugarte-Gil MF, Chaudier A, Kawka L, Bergier H, et al. Vaccination against COVID-19: Expectations and concerns of patients with autoimmune and rheumatic diseases. *The Lancet Rheumatology*. 2021 Apr;3(4):e243–5.
32. Priori R, Pellegrino G, Colafrancesco S, Alessandri C, Ceccarelli F, Di Franco M, et al. SARS-CoV-2 vaccine hesitancy among patients with rheumatic and musculoskeletal diseases: a message for rheumatologists. *Ann Rheum Dis*. 2021 Jul;80(7):953–4.
33. Tharwat S, Abdelsalam HA, Abdelsalam A, Nassar MK. COVID-19 Vaccination Intention and Vaccine Hesitancy among Patients with Autoimmune and Autoinflammatory Rheumatological Diseases: A Survey. Kasapcopur O, editor. *International Journal of Clinical Practice*. 2022 Jan 31;2022:5931506.
34. Galanis P, Vraka I, Katsiroumpa A, Siskou O, Konstantakopoulou O, Katsoulas T, et al. Predictors of Willingness of the General Public to Receive a Second COVID-19 Booster Dose or a New COVID-19 Vaccine: A Cross-Sectional Study in Greece. *Vaccines*. 2022 Jun 30;10(7):1061.
35. Galanis P, Katsiroumpa A, Sourtzi P, Siskou O, Konstantakopoulou O, Katsoulas T, et al. Social Support Mediates the Relationship between COVID-19-Related Burnout and Booster Vaccination Willingness among Fully Vaccinated Nurses. *Vaccines*. 2022 Dec 25;11(1):46.
36. Galanis P, Katsiroumpa A, Vraka I, Siskou O, Konstantakopoulou O, Katsoulas T, et al. Seasonal Influenza Vaccine Intention among Nurses Who Have Been Fully Vaccinated against COVID-19: Evidence from Greece. *Vaccines*. 2023 Jan 11;11(1):159.
37. Kilic D, Aslan G, Ata G, Bakan ABS. Relationship between the fear of COVID-19 and social isolation and depression in elderly individuals. *Psychogeriatrics*. 2022 Dec 14;
38. de Sousa ILM, Silveira R, Takito MY, Pereira AL, Lucianelli-Júnior D, Carmona GS, et al. The impact of the social isolation in elderly Brazilian mental health (anxiety and depression) during the COVID-19 pandemic. *Front Psychiatry*. 2022;13:888234.

39. Siegmund LA, Distelhorst KS, Bena JF, Morrison SL. Relationships between physical activity, social isolation, and depression among older adults during COVID-19: A path analysis. *Geriatr Nurs*. 2021;42(5):1240–4.
40. Mautong H, Gallardo-Rumbea JA, Alvarado-Villa GE, Fernández-Cadena JC, Andrade-Molina D, Orellana-Román CE, et al. Assessment of depression, anxiety and stress levels in the Ecuadorian general population during social isolation due to the COVID-19 outbreak: a cross-sectional study. *BMC Psychiatry*. 2021 Apr 28;21(1):212.
41. Miranda AR, Scotta AV, Cortez MV, Soria EA. Triggering of postpartum depression and insomnia with cognitive impairment in Argentinian women during the pandemic COVID-19 social isolation in relation to reproductive and health factors. *Midwifery*. 2021 Nov;102:103072.
42. Nkire N, Mrklas K, Hrabok M, Gusnowski A, Vuong W, Surood S, et al. COVID-19 Pandemic: Demographic Predictors of Self-Isolation or Self-Quarantine and Impact of Isolation and Quarantine on Perceived Stress, Anxiety, and Depression. *Front Psychiatry*. 2021;12:553468.
43. Galanis P, Vraka I, Siskou O, Konstantakopoulou O, Katsiroumpa A, Kaitelidou D. Predictors of COVID-19 vaccination uptake and reasons for decline of vaccination: a systematic review [Internet]. *Public and Global Health*; 2021 Jul [cited 2021 Sep 22]. Available from: <http://medrxiv.org/lookup/doi/10.1101/2021.07.28.21261261>
44. Galanis P, Vraka I, Siskou O, Konstantakopoulou O, Katsiroumpa A, Kaitelidou D. Willingness, refusal and influential factors of parents to vaccinate their children against the COVID-19: A systematic review and meta-analysis. *Preventive Medicine*. 2022 Apr;157:106994.
45. Moisoglou I, Passali C, Tsiachri M, Galanis P. Predictors of COVID-19 Vaccine Uptake in Teachers: An On-line Survey in Greece. *J Community Health* [Internet]. 2022 Oct 15 [cited 2023 Jan 27]; Available from: <https://link.springer.com/10.1007/s10900-022-01144-x>
46. Galanis P, Vraka I, Siskou O, Konstantakopoulou O, Katsiroumpa A, Moisoglou I, et al. Cross-sectional assessment of predictors for COVID-19 vaccine uptake: an online survey in Greece. *Vacunas*. 2022 Sep;23:S60–6.
47. Biswas M, Rahaman S, Biswas TK, Haque Z, Ibrahim B. Association of Sex, Age, and Comorbidities with Mortality in COVID-19 Patients: A Systematic Review and Meta-Analysis. *Intervirology*. 2020 Dec 9;1–12.

48. Mesas AE, Cavero-Redondo I, Álvarez-Bueno C, Sarriá Cabrera MA, Maffei de Andrade S, Sequí-Dominguez I, et al. Predictors of in-hospital COVID-19 mortality: A comprehensive systematic review and meta-analysis exploring differences by age, sex and health conditions. *PLoS One*. 2020;15(11):e0241742.
49. Patel U, Malik P, Usman MS, Mehta D, Sharma A, Malik FA, et al. Age-Adjusted Risk Factors Associated with Mortality and Mechanical Ventilation Utilization Amongst COVID-19 Hospitalizations-a Systematic Review and Meta-Analysis. *SN Compr Clin Med*. 2020;2(10):1740–9.
50. Galanis P, Moisoglou I, Vraka I, Siskou O, Konstantakopoulou O, Katsiroumpa A, et al. Predictors of COVID-19 Vaccine Uptake in Healthcare Workers: A Cross-Sectional Study in Greece. *Journal of Occupational & Environmental Medicine*. 2022 Apr;64(4):e191–6.
51. Anakpo G, Mishi S. Hesitancy of COVID-19 vaccines: Rapid systematic review of the measurement, predictors, and preventive strategies. *Hum Vaccin Immunother*. 2022 Nov 30;18(5):2074716.
52. Bianchi FP, Stefanizzi P, Cuscianna E, Riformato G, Di Lorenzo A, Giordano P, et al. COVID-19 vaccination hesitancy among Italian parents: A systematic review and meta-analysis. *Hum Vaccin Immunother*. 2023 Jan 25;2171185.
53. Santhanes D, Wong CP, Yap YY, San SP, Chaiyakunapruk N, Khan TM. Factors involved in human papillomavirus (HPV) vaccine hesitancy among women in the South-East Asian Region (SEAR) and Western Pacific Region (WPR): A scoping review. *Hum Vaccin Immunother*. 2018 Jan 2;14(1):124–33.
54. Karafillakis E, Simas C, Jarrett C, Verger P, Peretti-Watel P, Dib F, et al. HPV vaccination in a context of public mistrust and uncertainty: a systematic literature review of determinants of HPV vaccine hesitancy in Europe. *Hum Vaccin Immunother*. 2019;15(7–8):1615–27.
